# Supplementary material for: Tryptophan synthase ß subunit 1 affects stomatal phenotypes in Arabidopsis thaliana
Source: Frontiers journal article supplement (doi:10.3389/fpls.2022.1011360), 2022-11-28
Supplement: Data_Sheet_1.PDF [file Data_Sheet_1.PDF]

## Supplementary Figure 1

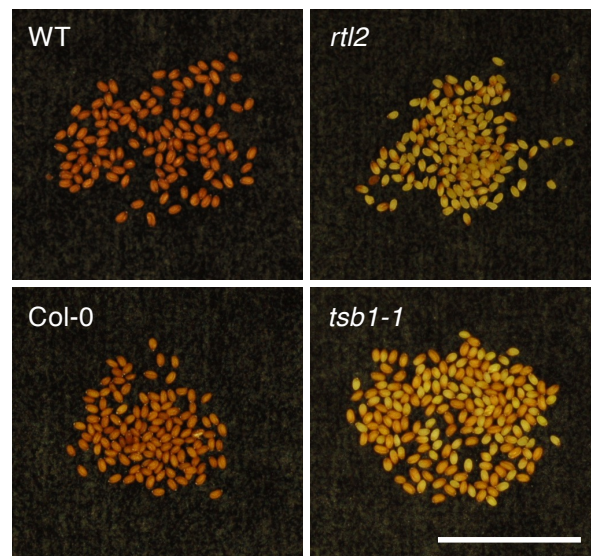

**SUPPLEMENTARY FIGURE 1** Color of dry seeds from WT, *rtl2*, Col-0, and *tsb1-1*. Dry seeds from mutants showed a lighter color than background strain seeds. Scale bar = 5 mm.
