# Supplementary material for: Tryptophan synthase ß subunit 1 affects stomatal phenotypes in Arabidopsis thaliana
Source: Frontiers journal article supplement (doi:10.3389/fpls.2022.1011360), 2022-11-28
Supplement: Data_Sheet_2.PDF [file Data_Sheet_2.PDF]

## Supplementary Figure 2

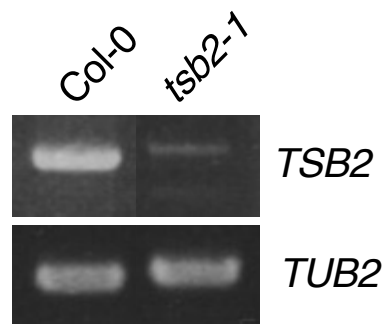

**SUPPLEMENTARY FIGURE 2** *TSB2* expression analyzed by RT-PCR in Col-0 and *tsb2-1*. Total RNA was extracted from rosette leaves of 5-week-old plants grown on MS plate for 4 weeks and transferred to soil for 1 week. *TUB2* was amplified as a control. PCRs were performed with 30 cycles for *TSB2* and with 25 cycles for *TUB2*, respectively.
