# Supplementary material for: Tryptophan synthase ß subunit 1 affects stomatal phenotypes in Arabidopsis thaliana
Source: Frontiers journal article supplement (doi:10.3389/fpls.2022.1011360), 2022-11-28
Supplement: Table_1.pdf [file Table_1.pdf]

**SUPPLEMENTARY TABLE 1.** Effect of exogenous L-Trp on stomatal size, index and density of *tsb1-1*.

|      |               | Stomatal size<br>( $\mu\text{m}$ ) | Stomatal index    | Stomatal density ( $\text{mm}^{-2}$ ) |
|------|---------------|------------------------------------|-------------------|---------------------------------------|
| Mock | Col-0         | 20.5 $\pm$ 2.31                    | 0.212 $\pm$ 0.031 | 213 $\pm$ 35.9                        |
|      | <i>tsb1-1</i> | 20.3 $\pm$ 2.39                    | 0.194 $\pm$ 0.021 | 167 $\pm$ 92.6                        |
| Trp  | Col-0         | 21.0 $\pm$ 2.57                    | 0.268 $\pm$ 0.051 | 239 $\pm$ 68.5                        |
|      | <i>tsb1-1</i> | 21.3 $\pm$ 2.49                    | 0.211 $\pm$ 0.013 | 194 $\pm$ 10.1                        |

Ten-day-old seedlings germinated on MS plate were transferred to hydroponic system with or without 0.25 mM L-Trp, and were grown for a further 3 to 4 weeks. Other details are the same as in Table 1.
